# Supplementary material for: A functionalized polyoxometalate solid for selective oxidation of styrene to benzaldehyde
Source: Royal Society of Chemistry journal article supplement (doi:10.1039/b924041a), 2010-01-01
Supplement: b924041a.pdf [file b924041a.pdf]

## A Functionalized Polyoxometalate Solid for Selective Oxidation of Styrene to Benzaldehyde

Jing Tang,<sup>1,2</sup> Xiu-Li Yang,<sup>1</sup> Xian-Wei Zhang,<sup>1</sup> Miao Wang<sup>1</sup> and Chuan-De Wu<sup>1\*</sup>

*Department of Chemistry, Zhejiang University, Hangzhou 310027, P. R. China*

*Department of Chemistry and Chemical Engineering, Heihe University, Heihe 164300, P. R. China*

### Figures

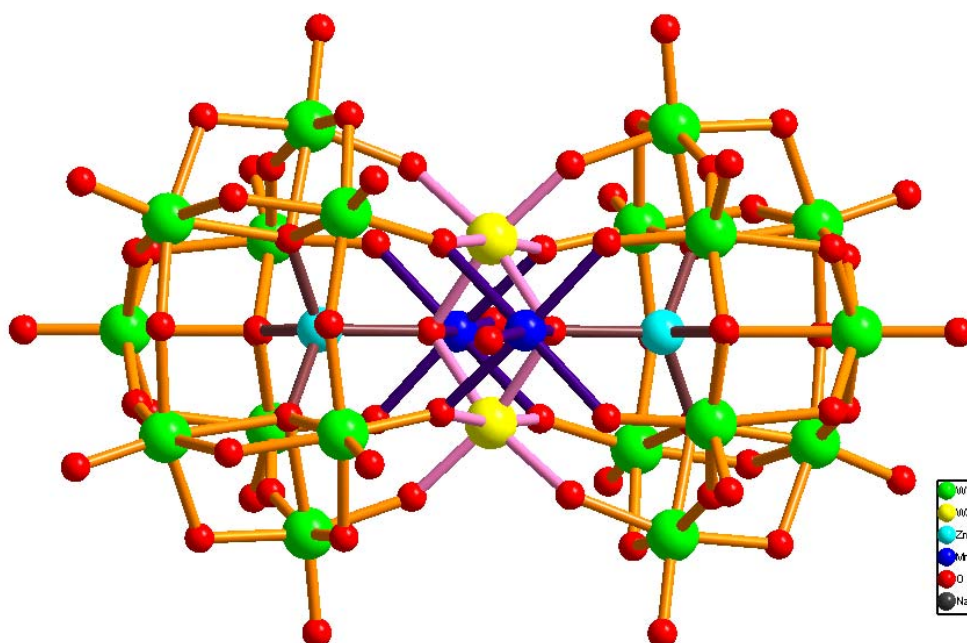

**Figure S1.** Ball-and-stick representation of the polyanion  $\{\text{Mn}_2\text{Zn}_3\text{W}_{19}\}$  in  $[\text{Na}_{12}(\text{H}_2\text{O})_{38}][\text{WZn}\{\text{Mn}(\text{H}_2\text{O})\}_2(\text{ZnW}_9\text{O}_{34})_2]\cdot 3\text{H}_2\text{O}$ .

\* E-mail address: [cdwu@zju.edu.cn](mailto:cdwu@zju.edu.cn)

<sup>1</sup> Zhejiang University

<sup>2</sup> Heihe University

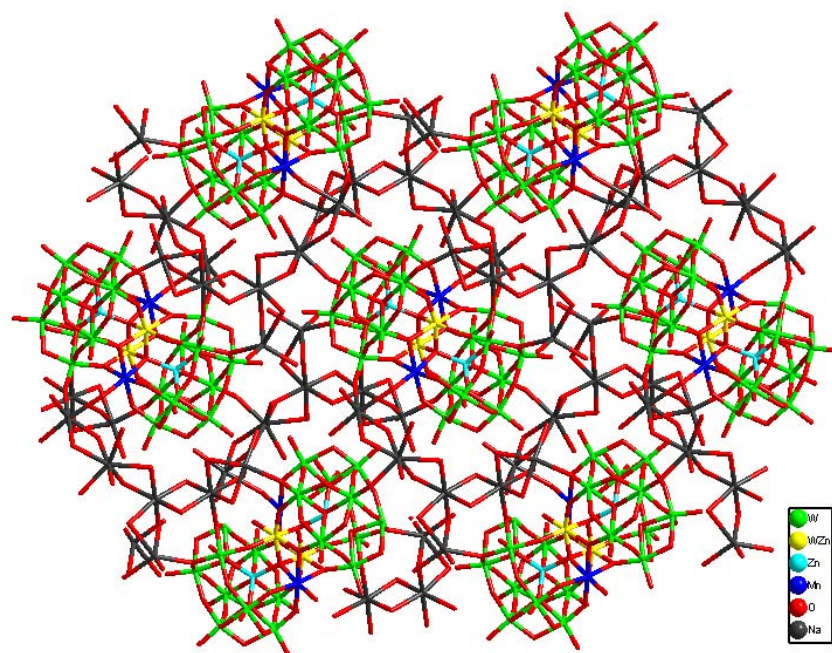

**Figure S2.** A view of the lamellar network of the polyanion  $\{\text{Mn}_2\text{Zn}_3\text{W}_{19}\}$  linked by sodium ions in  $[\text{Na}_{12}(\text{H}_2\text{O})_{38}][\text{WZn}\{\text{Mn}(\text{H}_2\text{O})\}_2(\text{ZnW}_9\text{O}_{34})_2]\cdot 3\text{H}_2\text{O}$ .

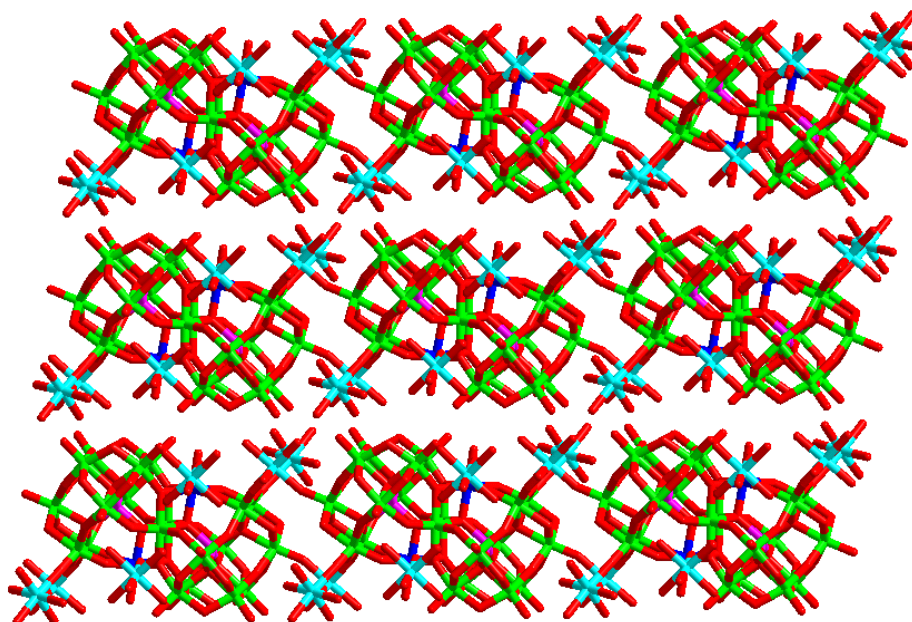

**Figure S3.** Packing diagram of **1** viewed down the *b* axis.

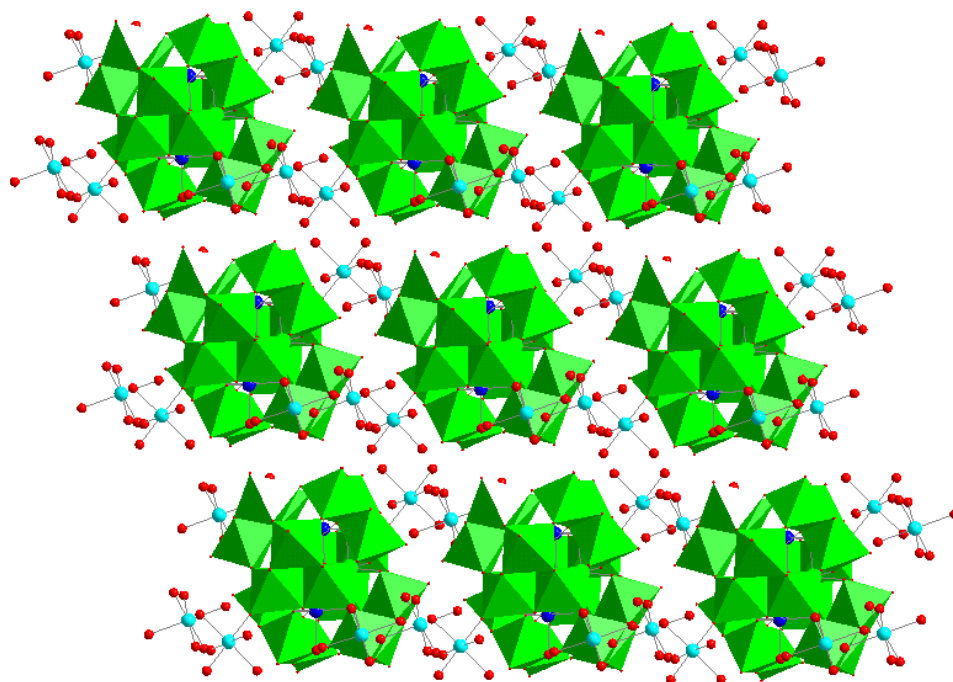

**Figure S4.** Packing diagram of **1** viewed down the *c* axis.

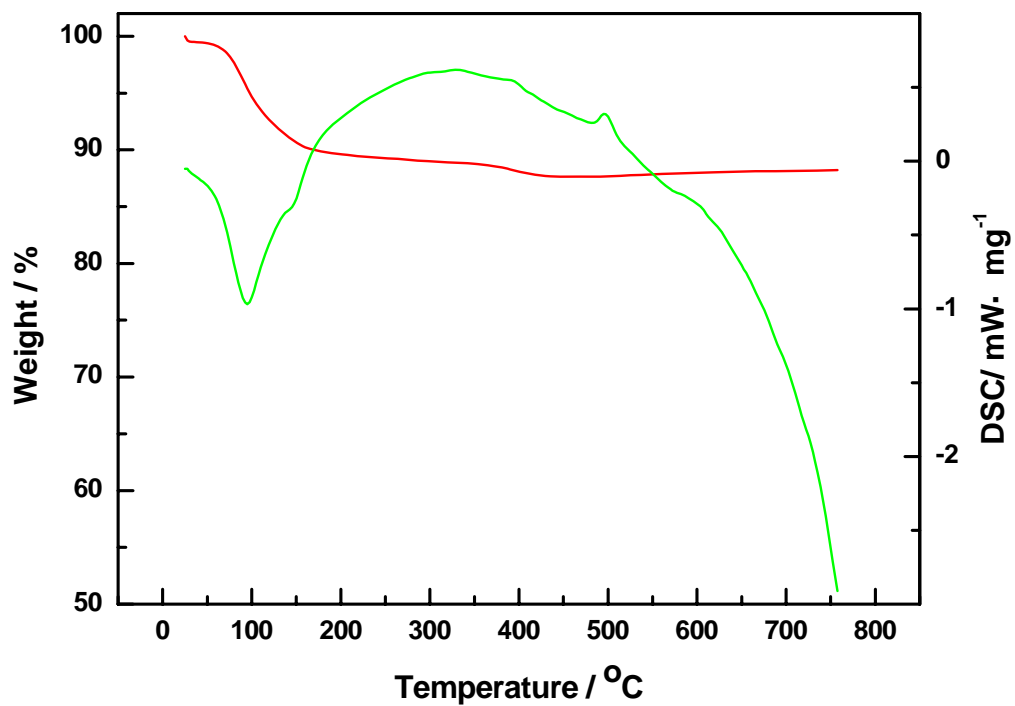

**Figure S5.** Thermogravimetric analysis result of **1**.

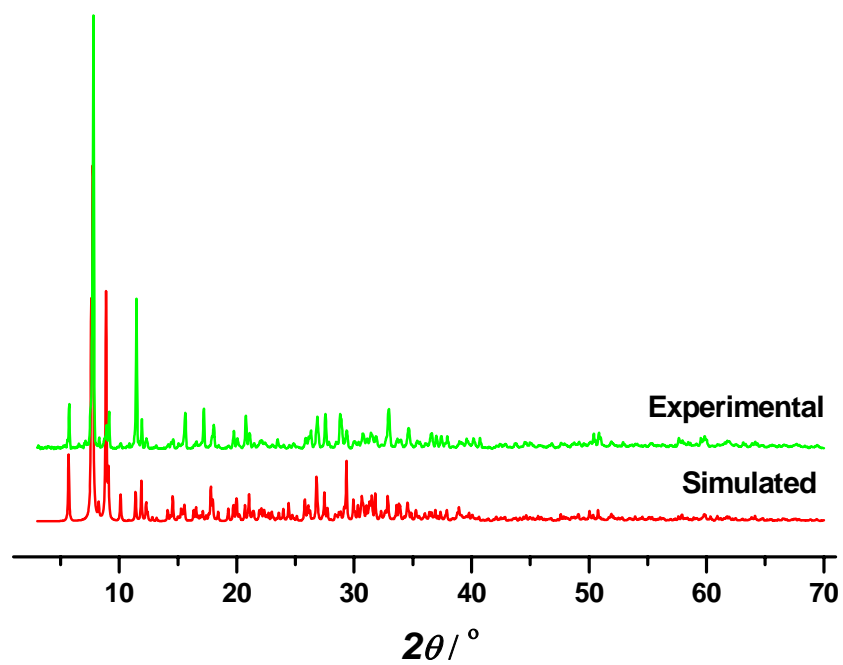

**Figure S6.** Powder X-ray diffraction patterns for compound **1**.

## Tables

**Table S1.** Selected bond lengths (Å) for **1**.

| Bond lengths | (Å)       | Bond lengths  | (Å)       | Bond lengths  | (Å)       |
|--------------|-----------|---------------|-----------|---------------|-----------|
| W(1)-O(28)   | 1.735(9)  | W(6)-O(9)     | 1.969(9)  | Co(1)-O(5)    | 2.056(8)  |
| W(1)-O(12)   | 1.840(9)  | W(6)-O(44)    | 1.983(9)  | Co(1)-O(21)   | 2.065(10) |
| W(1)-O(26)   | 1.910(10) | W(6)-O(35)    | 2.184(10) | Co(1)-O(3)    | 2.102(10) |
| W(1)-O(10)   | 1.968(9)  | W(7)-O(27)    | 1.730(10) | Co(1)-O(8)#1  | 2.154(10) |
| W(1)-O(9)    | 1.978(10) | W(7)-O(16)    | 1.901(9)  | Co(1)-O(16)#1 | 2.174(9)  |
| W(1)-O(35)   | 2.163(9)  | W(7)-O(4)     | 1.933(11) | Co(2)-O(25)   | 2.022(9)  |
| W(2)-O(47)   | 1.695(11) | W(7)-O(46)    | 1.952(10) | Co(2)-O(32)#2 | 2.056(9)  |
| W(2)-O(6)    | 1.902(10) | W(7)-O(14)    | 1.957(9)  | Co(2)-O(49)   | 2.071(10) |
| W(2)-O(7)    | 1.902(9)  | W(7)-O(34)    | 2.155(9)  | Co(2)-O(22)   | 2.124(12) |
| W(2)-O(46)   | 1.973(9)  | W(8)-O(48)    | 1.728(10) | Co(2)-O(19)   | 2.130(10) |
| W(2)-O(30)   | 1.978(8)  | W(8)-O(8)     | 1.906(9)  | Co(2)-O(24)   | 2.134(11) |
| W(2)-O(34)   | 2.197(9)  | W(8)-O(44)    | 1.915(11) | Co(3)-O(29)   | 2.055(10) |
| W(3)-O(25)   | 1.756(9)  | W(8)-O(4)     | 1.931(11) | Co(3)-O(42)   | 2.085(11) |
| W(3)-O(11)   | 1.834(10) | W(8)-O(10)    | 1.937(9)  | Co(3)-O(43)   | 2.095(11) |
| W(3)-O(15)   | 1.840(9)  | W(8)-O(35)    | 2.188(8)  | Co(3)-O(37)   | 2.107(13) |
| W(3)-O(12)   | 1.994(9)  | W(9)-O(29)    | 1.725(10) | Co(3)-O(36)   | 2.133(12) |
| W(3)-O(13)   | 1.998(9)  | W(9)-O(3)     | 1.764(9)  | Co(3)-O(38)   | 2.141(12) |
| W(3)-O(33)   | 2.209(9)  | W(9)-O(17)    | 1.926(9)  | Co(4)-O(50)   | 2.070(10) |
| W(4)-O(32)   | 1.729(9)  | W(9)-O(31)    | 1.990(9)  | Co(4)-O(45)   | 2.089(11) |
| W(4)-O(2)    | 1.794(9)  | W(9)-O(11)    | 2.104(9)  | Co(4)-O(39)   | 2.098(11) |
| W(4)-O(7)    | 1.913(9)  | W(9)-O(33)    | 2.138(9)  | Co(4)-O(40)   | 2.120(12) |
| W(4)-O(31)   | 1.916(10) | W(10)-O(6)    | 1.939(11) | Co(4)-O(41)   | 2.160(10) |
| W(4)-O(15)   | 2.090(9)  | W(10)-O(1)#1  | 1.968(12) | Co(4)-O(18)   | 2.181(11) |
| W(4)-O(33)   | 2.149(9)  | W(10)-O(5)    | 2.014(10) | O(1)-Zn(2)#1  | 1.968(12) |
| W(4)-W(9)    | 3.2289(9) | W(10)-O(5)#1  | 2.017(9)  | O(1)-W(10)#1  | 1.968(12) |
| W(5)-O(23)   | 1.743(9)  | W(10)-O(16)   | 2.061(9)  | O(5)-Zn(2)#1  | 2.017(9)  |
| W(5)-O(13)   | 1.840(9)  | W(10)-O(8)#1  | 2.064(9)  | O(5)-W(10)#1  | 2.017(9)  |
| W(5)-O(30)   | 1.931(9)  | W(10)-Zn(2)#1 | 3.122(2)  | O(8)-Zn(2)#1  | 2.064(9)  |
| W(5)-O(14)   | 1.969(9)  | W(10)-W(10)#1 | 3.122(2)  | O(8)-W(10)#1  | 2.064(9)  |
| W(5)-O(26)   | 1.969(10) | Zn(1)-O(35)   | 1.900(9)  | O(8)-Co(1)#1  | 2.154(10) |
| W(5)-O(34)   | 2.157(9)  | Zn(1)-O(5)    | 1.916(9)  | O(16)-Co(1)#1 | 2.174(9)  |
| W(6)-O(20)   | 1.689(11) | Zn(1)-O(34)   | 1.920(10) | O(32)-Co(2)#2 | 2.056(9)  |
| W(6)-O(17)   | 1.896(9)  | Zn(1)-O(33)   | 1.928(9)  |               |           |
| W(6)-O(1)    | 1.909(11) | Co(1)-O(2)    | 2.049(9)  |               |           |

**Table S2.** Selected angles (°) for **1**.

| Bond angles      | (°)      | Bond angles          | (°)      |
|------------------|----------|----------------------|----------|
| O(28)-W(1)-O(12) | 101.0(4) | O(1)#1-W(10)-O(5)#1  | 93.6(4)  |
| O(28)-W(1)-O(26) | 99.6(5)  | O(5)-W(10)-O(5)#1    | 78.5(4)  |
| O(12)-W(1)-O(26) | 87.3(4)  | O(6)-W(10)-O(16)     | 88.2(4)  |
| O(28)-W(1)-O(10) | 97.8(4)  | O(1)#1-W(10)-O(16)   | 95.7(4)  |
| O(12)-W(1)-O(10) | 161.2(4) | O(5)-W(10)-O(16)     | 93.2(4)  |
| O(26)-W(1)-O(10) | 88.0(4)  | O(5)#1-W(10)-O(16)   | 82.9(4)  |
| O(28)-W(1)-O(9)  | 96.2(5)  | O(6)-W(10)-O(8)#1    | 96.2(4)  |
| O(12)-W(1)-O(9)  | 89.8(4)  | O(1)#1-W(10)-O(8)#1  | 88.1(4)  |
| O(26)-W(1)-O(9)  | 164.2(4) | O(5)-W(10)-O(8)#1    | 82.3(4)  |
| O(10)-W(1)-O(9)  | 89.8(4)  | O(5)#1-W(10)-O(8)#1  | 92.1(4)  |
| O(28)-W(1)-O(35) | 168.2(4) | O(16)-W(10)-O(8)#1   | 173.9(4) |
| O(12)-W(1)-O(35) | 87.5(4)  | O(35)-Zn(1)-O(5)     | 114.0(4) |
| O(26)-W(1)-O(35) | 88.8(4)  | O(35)-Zn(1)-O(34)    | 105.6(4) |
| O(10)-W(1)-O(35) | 74.1(3)  | O(5)-Zn(1)-O(34)     | 113.8(4) |
| O(9)-W(1)-O(35)  | 75.5(4)  | O(35)-Zn(1)-O(33)    | 106.6(4) |
| O(47)-W(2)-O(6)  | 101.6(5) | O(5)-Zn(1)-O(33)     | 108.5(4) |
| O(47)-W(2)-O(7)  | 104.0(4) | O(34)-Zn(1)-O(33)    | 107.9(4) |
| O(6)-W(2)-O(7)   | 90.7(4)  | O(2)-Co(1)-O(5)      | 92.2(4)  |
| O(47)-W(2)-O(46) | 97.2(5)  | O(2)-Co(1)-O(21)     | 89.5(4)  |
| O(6)-W(2)-O(46)  | 85.4(4)  | O(5)-Co(1)-O(21)     | 178.1(4) |
| O(7)-W(2)-O(46)  | 158.8(4) | O(2)-Co(1)-O(3)      | 88.8(4)  |
| O(47)-W(2)-O(30) | 96.4(4)  | O(5)-Co(1)-O(3)      | 93.3(4)  |
| O(6)-W(2)-O(30)  | 161.0(4) | O(21)-Co(1)-O(3)     | 87.6(4)  |
| O(7)-W(2)-O(30)  | 90.8(4)  | O(2)-Co(1)-O(8)#1    | 93.4(4)  |
| O(46)-W(2)-O(30) | 86.4(4)  | O(5)-Co(1)-O(8)#1    | 79.2(4)  |
| O(47)-W(2)-O(34) | 166.9(4) | O(21)-Co(1)-O(8)#1   | 99.8(4)  |
| O(6)-W(2)-O(34)  | 86.7(4)  | O(3)-Co(1)-O(8)#1    | 172.3(4) |
| O(7)-W(2)-O(34)  | 85.7(4)  | O(2)-Co(1)-O(16)#1   | 171.4(4) |
| O(46)-W(2)-O(34) | 73.3(4)  | O(5)-Co(1)-O(16)#1   | 79.3(4)  |
| O(30)-W(2)-O(34) | 74.5(4)  | O(21)-Co(1)-O(16)#1  | 99.0(4)  |
| O(25)-W(3)-O(11) | 99.4(4)  | O(3)-Co(1)-O(16)#1   | 92.5(4)  |
| O(25)-W(3)-O(15) | 101.7(4) | O(8)#1-Co(1)-O(16)#1 | 84.3(4)  |
| O(11)-W(3)-O(15) | 97.4(4)  | O(25)-Co(2)-O(32)#2  | 90.8(4)  |
| O(25)-W(3)-O(12) | 97.0(4)  | O(25)-Co(2)-O(49)    | 176.2(4) |
| O(11)-W(3)-O(12) | 89.3(4)  | O(32)#2-Co(2)-O(49)  | 86.8(4)  |
| O(15)-W(3)-O(12) | 158.9(4) | O(25)-Co(2)-O(22)    | 90.5(4)  |
| O(25)-W(3)-O(13) | 98.6(4)  | O(32)#2-Co(2)-O(22)  | 88.1(4)  |
| O(11)-W(3)-O(13) | 160.1(4) | O(49)-Co(2)-O(22)    | 92.4(4)  |

|                  |          |                      |          |
|------------------|----------|----------------------|----------|
| O(15)-W(3)-O(13) | 87.2(4)  | O(25)-Co(2)-O(19)    | 88.5(4)  |
| O(12)-W(3)-O(13) | 80.1(4)  | O(32)#2-Co(2)-O(19)  | 179.1(4) |
| O(25)-W(3)-O(33) | 174.0(4) | O(49)-Co(2)-O(19)    | 94.0(4)  |
| O(11)-W(3)-O(33) | 75.6(4)  | O(22)-Co(2)-O(19)    | 91.4(4)  |
| O(15)-W(3)-O(33) | 75.9(4)  | O(25)-Co(2)-O(24)    | 87.3(4)  |
| O(12)-W(3)-O(33) | 86.4(3)  | O(32)#2-Co(2)-O(24)  | 92.0(4)  |
| O(13)-W(3)-O(33) | 86.8(3)  | O(49)-Co(2)-O(24)    | 89.9(4)  |
| O(32)-W(4)-O(2)  | 102.6(4) | O(22)-Co(2)-O(24)    | 177.7(4) |
| O(32)-W(4)-O(7)  | 101.5(4) | O(19)-Co(2)-O(24)    | 88.4(4)  |
| O(2)-W(4)-O(7)   | 93.9(4)  | O(29)-Co(3)-O(42)    | 175.1(4) |
| O(32)-W(4)-O(31) | 95.7(4)  | O(29)-Co(3)-O(43)    | 86.5(4)  |
| O(2)-W(4)-O(31)  | 93.1(4)  | O(42)-Co(3)-O(43)    | 89.0(4)  |
| O(7)-W(4)-O(31)  | 159.6(4) | O(29)-Co(3)-O(37)    | 92.7(4)  |
| O(32)-W(4)-O(15) | 93.2(4)  | O(42)-Co(3)-O(37)    | 89.4(5)  |
| O(2)-W(4)-O(15)  | 164.0(4) | O(43)-Co(3)-O(37)    | 92.9(5)  |
| O(7)-W(4)-O(15)  | 85.0(4)  | O(29)-Co(3)-O(36)    | 95.6(5)  |
| O(31)-W(4)-O(15) | 83.0(4)  | O(42)-Co(3)-O(36)    | 88.8(5)  |
| O(32)-W(4)-O(33) | 163.2(4) | O(43)-Co(3)-O(36)    | 176.8(5) |
| O(2)-W(4)-O(33)  | 91.5(4)  | O(37)-Co(3)-O(36)    | 89.5(5)  |
| O(7)-W(4)-O(33)  | 86.4(4)  | O(29)-Co(3)-O(38)    | 90.0(4)  |
| O(31)-W(4)-O(33) | 74.2(4)  | O(42)-Co(3)-O(38)    | 87.9(5)  |
| O(15)-W(4)-O(33) | 72.5(3)  | O(43)-Co(3)-O(38)    | 87.9(5)  |
| O(23)-W(5)-O(13) | 103.2(4) | O(37)-Co(3)-O(38)    | 177.2(5) |
| O(23)-W(5)-O(30) | 97.3(4)  | O(36)-Co(3)-O(38)    | 89.6(5)  |
| O(13)-W(5)-O(30) | 93.2(4)  | O(50)-Co(4)-O(45)    | 88.9(5)  |
| O(23)-W(5)-O(14) | 95.3(4)  | O(50)-Co(4)-O(39)    | 92.7(4)  |
| O(13)-W(5)-O(14) | 160.6(4) | O(45)-Co(4)-O(39)    | 92.9(5)  |
| O(30)-W(5)-O(14) | 90.0(4)  | O(50)-Co(4)-O(40)    | 178.2(5) |
| O(23)-W(5)-O(26) | 99.0(4)  | O(45)-Co(4)-O(40)    | 89.9(5)  |
| O(13)-W(5)-O(26) | 86.3(4)  | O(39)-Co(4)-O(40)    | 88.7(5)  |
| O(30)-W(5)-O(26) | 163.4(4) | O(50)-Co(4)-O(41)    | 90.4(4)  |
| O(14)-W(5)-O(26) | 85.3(4)  | O(45)-Co(4)-O(41)    | 84.7(5)  |
| O(23)-W(5)-O(34) | 167.0(4) | O(39)-Co(4)-O(41)    | 176.0(5) |
| O(13)-W(5)-O(34) | 88.6(4)  | O(40)-Co(4)-O(41)    | 88.1(5)  |
| O(30)-W(5)-O(34) | 76.3(4)  | O(50)-Co(4)-O(18)    | 87.9(4)  |
| O(14)-W(5)-O(34) | 73.6(3)  | O(45)-Co(4)-O(18)    | 175.3(4) |
| O(26)-W(5)-O(34) | 87.1(4)  | O(39)-Co(4)-O(18)    | 90.8(4)  |
| O(20)-W(6)-O(17) | 100.9(5) | O(40)-Co(4)-O(18)    | 93.2(5)  |
| O(20)-W(6)-O(1)  | 100.8(5) | O(41)-Co(4)-O(18)    | 91.8(4)  |
| O(17)-W(6)-O(1)  | 90.0(4)  | W(6)-O(1)-Zn(2)#1    | 143.8(6) |
| O(20)-W(6)-O(9)  | 97.3(5)  | W(6)-O(1)-W(10)#1    | 143.8(6) |
| O(17)-W(6)-O(9)  | 91.5(4)  | Zn(2)#1-O(1)-W(10)#1 | 0.00(10) |
| O(1)-W(6)-O(9)   | 161.3(4) | W(4)-O(2)-Co(1)      | 138.9(6) |
| O(20)-W(6)-O(44) | 98.3(4)  | W(9)-O(3)-Co(1)      | 137.0(6) |

|                  |          |                      |          |
|------------------|----------|----------------------|----------|
| O(17)-W(6)-O(44) | 160.8(4) | W(8)-O(4)-W(7)       | 155.9(5) |
| O(1)-W(6)-O(44)  | 85.9(4)  | Zn(1)-O(5)-W(10)     | 115.3(5) |
| O(9)-W(6)-O(44)  | 86.7(4)  | Zn(1)-O(5)-Zn(2)#1   | 115.6(5) |
| O(20)-W(6)-O(35) | 169.4(4) | W(10)-O(5)-Zn(2)#1   | 101.5(4) |
| O(17)-W(6)-O(35) | 86.9(4)  | Zn(1)-O(5)-W(10)#1   | 115.6(5) |
| O(1)-W(6)-O(35)  | 86.3(4)  | W(10)-O(5)-W(10)#1   | 101.5(4) |
| O(9)-W(6)-O(35)  | 75.2(4)  | Zn(2)#1-O(5)-W(10)#1 | 0.00(5)  |
| O(44)-W(6)-O(35) | 74.1(4)  | Zn(1)-O(5)-Co(1)     | 119.8(4) |
| O(27)-W(7)-O(16) | 102.3(5) | W(10)-O(5)-Co(1)     | 100.9(4) |
| O(27)-W(7)-O(4)  | 101.5(4) | Zn(2)#1-O(5)-Co(1)   | 100.9(4) |
| O(16)-W(7)-O(4)  | 88.1(4)  | W(10)#1-O(5)-Co(1)   | 100.9(4) |
| O(27)-W(7)-O(46) | 96.9(5)  | W(2)-O(6)-W(10)      | 143.7(6) |
| O(16)-W(7)-O(46) | 86.5(4)  | W(2)-O(7)-W(4)       | 153.8(5) |
| O(4)-W(7)-O(46)  | 161.5(4) | W(8)-O(8)-Zn(2)#1    | 138.8(5) |
| O(27)-W(7)-O(14) | 96.2(4)  | W(8)-O(8)-W(10)#1    | 138.8(5) |
| O(16)-W(7)-O(14) | 161.3(4) | Zn(2)#1-O(8)-W(10)#1 | 0.00(7)  |
| O(4)-W(7)-O(14)  | 91.3(4)  | W(8)-O(8)-Co(1)#1    | 123.6(5) |
| O(46)-W(7)-O(14) | 88.2(4)  | Zn(2)#1-O(8)-Co(1)#1 | 96.1(4)  |
| O(27)-W(7)-O(34) | 166.9(4) | W(10)#1-O(8)-Co(1)#1 | 96.1(4)  |
| O(16)-W(7)-O(34) | 87.4(4)  | W(6)-O(9)-W(1)       | 111.7(5) |
| O(4)-W(7)-O(34)  | 87.5(4)  | W(8)-O(10)-W(1)      | 114.0(4) |
| O(46)-W(7)-O(34) | 74.6(4)  | W(3)-O(11)-W(9)      | 113.6(5) |
| O(14)-W(7)-O(34) | 73.9(4)  | W(1)-O(12)-W(3)      | 155.7(6) |
| O(48)-W(8)-O(8)  | 102.4(5) | W(5)-O(13)-W(3)      | 156.2(6) |
| O(48)-W(8)-O(44) | 99.4(5)  | W(7)-O(14)-W(5)      | 113.4(4) |
| O(8)-W(8)-O(44)  | 90.2(5)  | W(3)-O(15)-W(4)      | 113.5(4) |
| O(48)-W(8)-O(4)  | 99.5(5)  | W(7)-O(16)-W(10)     | 139.3(5) |
| O(8)-W(8)-O(4)   | 86.1(4)  | W(7)-O(16)-Co(1)#1   | 122.1(4) |
| O(44)-W(8)-O(4)  | 161.1(4) | W(10)-O(16)-Co(1)#1  | 95.7(4)  |
| O(48)-W(8)-O(10) | 97.3(4)  | W(6)-O(17)-W(9)      | 153.9(6) |
| O(8)-W(8)-O(10)  | 160.3(4) | W(3)-O(25)-Co(2)     | 160.3(5) |
| O(44)-W(8)-O(10) | 88.1(4)  | W(1)-O(26)-W(5)      | 147.1(5) |
| O(4)-W(8)-O(10)  | 89.2(4)  | W(9)-O(29)-Co(3)     | 167.8(6) |
| O(48)-W(8)-O(35) | 169.9(4) | W(5)-O(30)-W(2)      | 112.4(4) |
| O(8)-W(8)-O(35)  | 86.4(4)  | W(4)-O(31)-W(9)      | 111.5(4) |
| O(44)-W(8)-O(35) | 75.3(4)  | W(4)-O(32)-Co(2)#2   | 154.3(6) |
| O(4)-W(8)-O(35)  | 85.9(4)  | Zn(1)-O(33)-W(9)     | 118.8(4) |
| O(10)-W(8)-O(35) | 74.1(4)  | Zn(1)-O(33)-W(4)     | 117.4(4) |
| O(29)-W(9)-O(3)  | 103.1(5) | W(9)-O(33)-W(4)      | 97.7(3)  |
| O(29)-W(9)-O(17) | 101.4(4) | Zn(1)-O(33)-W(3)     | 121.6(4) |
| O(3)-W(9)-O(17)  | 94.5(4)  | W(9)-O(33)-W(3)      | 98.7(4)  |
| O(29)-W(9)-O(31) | 96.8(4)  | W(4)-O(33)-W(3)      | 98.0(3)  |
| O(3)-W(9)-O(31)  | 93.1(4)  | Zn(1)-O(34)-W(7)     | 118.5(4) |
| O(17)-W(9)-O(31) | 158.2(4) | Zn(1)-O(34)-W(5)     | 122.8(5) |



---

|                   |          |                  |          |
|-------------------|----------|------------------|----------|
| O(29)-W(9)-O(11)  | 91.3(4)  | W(7)-O(34)-W(5)  | 99.1(4)  |
| O(3)-W(9)-O(11)   | 165.4(4) | Zn(1)-O(34)-W(2) | 117.0(4) |
| O(17)-W(9)-O(11)  | 85.1(4)  | W(7)-O(34)-W(2)  | 98.0(4)  |
| O(31)-W(9)-O(11)  | 82.5(4)  | W(5)-O(34)-W(2)  | 96.5(4)  |
| O(29)-W(9)-O(33)  | 161.3(4) | Zn(1)-O(35)-W(1) | 122.5(4) |
| O(3)-W(9)-O(33)   | 93.3(4)  | Zn(1)-O(35)-W(6) | 118.1(4) |
| O(17)-W(9)-O(33)  | 86.1(4)  | W(1)-O(35)-W(6)  | 97.5(4)  |
| O(31)-W(9)-O(33)  | 73.0(4)  | Zn(1)-O(35)-W(8) | 119.2(5) |
| O(11)-W(9)-O(33)  | 72.1(4)  | W(1)-O(35)-W(8)  | 97.7(3)  |
| O(6)-W(10)-O(1)#1 | 95.4(5)  | W(6)-O(35)-W(8)  | 96.5(3)  |
| O(6)-W(10)-O(5)   | 94.0(4)  | W(8)-O(44)-W(6)  | 113.5(5) |
| O(1)#1-W(10)-O(5) | 167.2(4) | W(7)-O(46)-W(2)  | 113.6(5) |
| O(6)-W(10)-O(5)#1 | 168.0(4) |                  |          |

---

Symmetry transformations used to generate equivalent atoms: #1: -x+2, -y+2, -z; #2 : -x+2, -y+2,

-z+1

**Table S3.** Selected bond lengths (Å) for {  $\text{Na}_{12}\text{Mn}_2\text{Zn}_3\text{W}_{19}$  }.

| Bond lengths | (Å)       | Bond lengths  | (Å)       | Bond lengths  | (Å)       |
|--------------|-----------|---------------|-----------|---------------|-----------|
| W(1)-O(12)   | 1.735(11) | W(7)-O(27)    | 1.772(11) | Na(1)-O(40)   | 2.395(15) |
| W(1)-O(17)   | 1.900(12) | W(7)-O(1)     | 1.907(11) | Na(1)-O(37)   | 2.416(14) |
| W(1)-O(4)    | 1.920(9)  | W(7)-O(11)    | 1.988(11) | Na(1)-O(51)   | 2.430(19) |
| W(1)-O(28)   | 1.944(9)  | W(7)-O(16)    | 2.107(11) | Na(1)-O(39)   | 2.476(15) |
| W(1)-O(9)    | 1.956(10) | W(7)-O(23)    | 2.153(10) | Na(1)-Na(3)   | 3.451(10) |
| W(1)-O(21)   | 2.187(9)  | W(7)-W(9)     | 3.2355(9) | Na(1)-Na(6)   | 3.49(2)   |
| W(2)-O(26)   | 1.743(10) | W(8)-O(30)    | 1.732(10) | Na(1)-Na(4)#3 | 3.722(11) |
| W(2)-O(25)   | 1.858(10) | W(8)-O(18)    | 1.869(10) | Na(2)-O(48)   | 2.284(17) |
| W(2)-O(16)   | 1.872(11) | W(8)-O(22)    | 1.918(10) | Na(2)-O(41)   | 2.310(14) |
| W(2)-O(31)   | 1.951(9)  | W(8)-O(9)     | 1.972(11) | Na(2)-O(49)   | 2.347(19) |
| W(2)-O(18)   | 1.967(10) | W(8)-O(7)     | 1.994(10) | Na(2)-O(43)   | 2.469(15) |
| W(2)-O(23)   | 2.237(9)  | W(8)-O(21)    | 2.176(8)  | Na(2)-Na(4)   | 3.858(11) |
| W(3)-O(2)    | 1.725(11) | W(8)-Na(6)    | 3.708(17) | Na(3)-O(38)   | 2.357(15) |
| W(3)-O(1)    | 1.905(11) | W(9)-O(6)     | 1.729(13) | Na(3)-O(39)   | 2.376(15) |
| W(3)-O(5)#1  | 1.928(9)  | W(9)-O(13)    | 1.780(11) | Na(3)-O(45)   | 2.396(15) |
| W(3)-O(20)   | 1.953(11) | W(9)-O(11)    | 1.921(11) | Na(3)-O(42)   | 2.442(13) |
| W(3)-O(29)   | 1.982(10) | W(9)-O(32)    | 1.961(10) | Na(3)-O(37)   | 2.446(15) |
| W(3)-O(24)   | 2.166(9)  | W(9)-O(25)    | 2.095(10) | Na(3)-Na(5)   | 3.222(10) |
| W(4)-O(10)   | 1.727(10) | W(9)-O(23)    | 2.138(10) | Na(4)-O(44)   | 2.357(16) |
| W(4)-O(32)   | 1.871(10) | W(10)-O(5)    | 1.879(9)  | Na(4)-O(33)#4 | 2.454(13) |
| W(4)-O(19)   | 1.921(10) | W(10)-O(19)   | 1.900(10) | Na(4)-O(41)   | 2.481(16) |
| W(4)-O(7)    | 1.963(9)  | W(10)-O(14)#1 | 1.994(9)  | Na(4)-O(40)#5 | 2.575(15) |
| W(4)-O(4)    | 1.995(10) | W(10)-O(14)   | 2.013(8)  | Na(4)-O(46)   | 2.604(17) |
| W(4)-O(21)   | 2.146(9)  | W(10)-O(17)   | 2.109(13) | Na(4)-O(36)#5 | 2.608(14) |
| W(5)-O(33)   | 1.733(10) | W(10)-O(3)#1  | 2.169(14) | Na(4)-O(43)   | 2.623(17) |
| W(5)-O(31)   | 1.879(10) | Zn(1)-O(24)   | 1.923(9)  | Na(4)-Na(1)#5 | 3.723(11) |
| W(5)-O(15)   | 1.933(10) | Zn(1)-O(23)   | 1.923(9)  | Na(5)-O(45)   | 2.384(16) |
| W(5)-O(22)   | 1.946(11) | Zn(1)-O(21)   | 1.933(8)  | Na(5)-O(2)#1  | 2.385(14) |
| W(5)-O(29)   | 1.963(10) | Zn(1)-O(14)   | 1.951(9)  | Na(5)-O(54)   | 2.37(4)   |
| W(5)-O(24)   | 2.214(9)  | Mn(1)-O(13)#1 | 2.083(15) | Na(5)-O(42)   | 2.405(13) |
| W(6)-O(34)   | 1.747(11) | Mn(1)-O(27)#1 | 2.091(12) | Na(5)-O(50)   | 2.54(2)   |
| W(6)-O(3)    | 1.889(11) | Mn(1)-O(14)#1 | 2.091(10) | Na(5)-O(38)   | 2.570(15) |
| W(6)-O(28)   | 1.912(9)  | Mn(1)-O(35)   | 2.156(12) | Na(6)-O(47)   | 2.24(3)   |
| W(6)-O(20)   | 1.954(10) | Mn(1)-O(3)    | 2.161(11) | Na(6)-O(52)   | 2.40(4)   |
| W(6)-O(15)   | 1.988(10) | Mn(1)-O(17)   | 2.203(11) | Na(6)-O(53)   | 2.40(4)   |
| W(6)-O(24)   | 2.136(9)  | Na(1)-O(47)   | 2.292(16) | Na(6)-O(51)   | 2.79(3)   |
| W(7)-O(8)    | 1.739(11) | Na(1)-O(36)   | 2.338(13) |               |           |

**Table S4.** Selected angles ( $^{\circ}$ ) for {  $\text{Na}_{12}\text{Mn}_2\text{Zn}_3\text{W}_{19}$  }.

| Bond angles       | ( $^{\circ}$ ) | Bond angles           | ( $^{\circ}$ ) |
|-------------------|----------------|-----------------------|----------------|
| O(12)-W(1)-O(17)  | 102.7(6)       | O(35)-Mn(1)-O(17)     | 102.2(5)       |
| O(12)-W(1)-O(4)   | 99.3(5)        | O(3)-Mn(1)-O(17)      | 82.6(4)        |
| O(17)-W(1)-O(4)   | 89.9(5)        | W(3)-O(1)-W(7)        | 156.5(6)       |
| O(12)-W(1)-O(28)  | 100.7(5)       | W(3)-O(2)-Na(5)#1     | 140.3(7)       |
| O(17)-W(1)-O(28)  | 86.8(4)        | W(6)-O(3)-Mn(1)       | 124.4(7)       |
| O(4)-W(1)-O(28)   | 160.0(4)       | W(6)-O(3)-Zn(2)#1     | 136.8(7)       |
| O(12)-W(1)-O(9)   | 95.4(5)        | Mn(1)-O(3)-Zn(2)#1    | 96.5(4)        |
| O(17)-W(1)-O(9)   | 161.8(5)       | W(6)-O(3)-W(10)#1     | 136.8(7)       |
| O(4)-W(1)-O(9)    | 89.3(5)        | Mn(1)-O(3)-W(10)#1    | 96.5(4)        |
| O(28)-W(1)-O(9)   | 87.8(4)        | Zn(2)#1-O(3)-W(10)#1  | 0.00(3)        |
| O(12)-W(1)-O(21)  | 168.1(4)       | W(1)-O(4)-W(4)        | 112.1(4)       |
| O(17)-W(1)-O(21)  | 88.1(4)        | W(1)-O(4)-Na(3)       | 127.9(5)       |
| O(4)-W(1)-O(21)   | 75.4(4)        | W(4)-O(4)-Na(3)       | 118.2(4)       |
| O(28)-W(1)-O(21)  | 84.8(4)        | W(10)-O(5)-W(3)#1     | 145.9(6)       |
| O(9)-W(1)-O(21)   | 74.1(4)        | W(4)-O(7)-W(8)        | 111.1(4)       |
| O(26)-W(2)-O(25)  | 100.4(5)       | W(4)-O(7)-Na(6)       | 133.4(7)       |
| O(26)-W(2)-O(16)  | 100.6(5)       | W(8)-O(7)-Na(6)       | 113.3(7)       |
| O(25)-W(2)-O(16)  | 96.3(5)        | W(1)-O(9)-W(8)        | 113.8(5)       |
| O(26)-W(2)-O(31)  | 98.6(5)        | W(9)-O(11)-W(7)       | 111.7(5)       |
| O(25)-W(2)-O(31)  | 159.6(4)       | W(1)-O(12)-Na(2)      | 139.6(6)       |
| O(16)-W(2)-O(31)  | 87.2(4)        | W(9)-O(13)-Mn(1)#1    | 134.9(8)       |
| O(26)-W(2)-O(18)  | 98.3(5)        | Zn(1)-O(14)-Zn(2)#1   | 114.9(4)       |
| O(25)-W(2)-O(18)  | 88.1(4)        | Zn(1)-O(14)-W(10)#1   | 114.9(4)       |
| O(16)-W(2)-O(18)  | 159.5(4)       | Zn(2)#1-O(14)-W(10)#1 | 0.00(6)        |
| O(31)-W(2)-O(18)  | 82.1(4)        | Zn(1)-O(14)-W(10)     | 113.6(4)       |
| O(26)-W(2)-O(23)  | 173.3(4)       | Zn(2)#1-O(14)-W(10)   | 102.9(4)       |
| O(25)-W(2)-O(23)  | 75.2(4)        | W(10)#1-O(14)-W(10)   | 102.9(4)       |
| O(16)-W(2)-O(23)  | 75.3(4)        | Zn(1)-O(14)-Mn(1)#1   | 116.9(4)       |
| O(31)-W(2)-O(23)  | 86.4(4)        | Zn(2)#1-O(14)-Mn(1)#1 | 103.0(4)       |
| O(18)-W(2)-O(23)  | 86.7(4)        | W(10)#1-O(14)-Mn(1)#1 | 103.0(4)       |
| O(2)-W(3)-O(1)    | 103.3(5)       | W(10)-O(14)-Mn(1)#1   | 103.8(4)       |
| O(2)-W(3)-O(5)#1  | 101.2(5)       | W(5)-O(15)-W(6)       | 113.7(5)       |
| O(1)-W(3)-O(5)#1  | 89.3(5)        | W(2)-O(16)-W(7)       | 113.4(5)       |
| O(2)-W(3)-O(20)   | 96.5(5)        | W(1)-O(17)-W(10)      | 135.8(6)       |
| O(1)-W(3)-O(20)   | 160.2(4)       | W(1)-O(17)-Mn(1)      | 126.1(6)       |
| O(5)#1-W(3)-O(20) | 86.8(5)        | W(10)-O(17)-Mn(1)     | 95.8(5)        |
| O(2)-W(3)-O(29)   | 96.2(5)        | W(8)-O(18)-W(2)       | 154.3(6)       |
| O(1)-W(3)-O(29)   | 90.6(5)        | W(10)-O(19)-W(4)      | 145.1(5)       |
| O(5)#1-W(3)-O(29) | 162.2(4)       | W(6)-O(20)-W(3)       | 112.6(5)       |
| O(20)-W(3)-O(29)  | 87.3(5)        | Zn(1)-O(21)-W(4)      | 116.0(4)       |
| O(2)-W(3)-O(24)   | 167.6(5)       | Zn(1)-O(21)-W(8)      | 122.2(4)       |

|                   |          |                    |          |
|-------------------|----------|--------------------|----------|
| O(1)-W(3)-O(24)   | 86.5(4)  | W(4)-O(21)-W(8)    | 98.0(3)  |
| O(5)#1-W(3)-O(24) | 86.3(4)  | Zn(1)-O(21)-W(1)   | 120.5(4) |
| O(20)-W(3)-O(24)  | 74.0(4)  | W(4)-O(21)-W(1)    | 97.1(3)  |
| O(29)-W(3)-O(24)  | 75.9(4)  | W(8)-O(21)-W(1)    | 97.9(3)  |
| O(10)-W(4)-O(32)  | 100.6(5) | W(8)-O(22)-W(5)    | 146.7(6) |
| O(10)-W(4)-O(19)  | 101.4(5) | Zn(1)-O(23)-W(9)   | 119.0(5) |
| O(32)-W(4)-O(19)  | 90.4(4)  | Zn(1)-O(23)-W(7)   | 117.1(5) |
| O(10)-W(4)-O(7)   | 96.4(5)  | W(9)-O(23)-W(7)    | 97.9(4)  |
| O(32)-W(4)-O(7)   | 91.7(4)  | Zn(1)-O(23)-W(2)   | 121.3(5) |
| O(19)-W(4)-O(7)   | 161.4(4) | W(9)-O(23)-W(2)    | 98.3(4)  |
| O(10)-W(4)-O(4)   | 95.7(4)  | W(7)-O(23)-W(2)    | 98.6(4)  |
| O(32)-W(4)-O(4)   | 163.7(4) | Zn(1)-O(24)-W(6)   | 119.3(4) |
| O(19)-W(4)-O(4)   | 85.9(4)  | Zn(1)-O(24)-W(3)   | 116.9(4) |
| O(7)-W(4)-O(4)    | 86.9(4)  | W(6)-O(24)-W(3)    | 98.1(3)  |
| O(10)-W(4)-O(21)  | 168.0(4) | Zn(1)-O(24)-W(5)   | 122.8(4) |
| O(32)-W(4)-O(21)  | 89.1(4)  | W(6)-O(24)-W(5)    | 98.0(4)  |
| O(19)-W(4)-O(21)  | 85.6(4)  | W(3)-O(24)-W(5)    | 96.7(3)  |
| O(7)-W(4)-O(21)   | 76.0(4)  | W(2)-O(25)-W(9)    | 113.6(5) |
| O(4)-W(4)-O(21)   | 74.9(3)  | W(7)-O(27)-Mn(1)#1 | 135.9(7) |
| O(33)-W(5)-O(31)  | 101.5(5) | W(6)-O(28)-W(1)    | 154.3(6) |
| O(33)-W(5)-O(15)  | 98.7(5)  | W(5)-O(29)-W(3)    | 112.1(5) |
| O(31)-W(5)-O(15)  | 159.6(4) | W(5)-O(31)-W(2)    | 156.0(6) |
| O(33)-W(5)-O(22)  | 99.0(5)  | W(4)-O(32)-W(9)    | 154.0(6) |
| O(31)-W(5)-O(22)  | 86.9(4)  | W(5)-O(33)-Na(4)#2 | 143.3(6) |
| O(15)-W(5)-O(22)  | 86.7(4)  | Mn(1)-O(35)-Na(2)  | 127.7(6) |
| O(33)-W(5)-O(29)  | 97.8(5)  | O(47)-Na(1)-O(36)  | 171.5(7) |
| O(31)-W(5)-O(29)  | 89.9(5)  | O(47)-Na(1)-O(40)  | 95.4(6)  |
| O(15)-W(5)-O(29)  | 90.6(5)  | O(36)-Na(1)-O(40)  | 78.9(5)  |
| O(22)-W(5)-O(29)  | 163.2(4) | O(47)-Na(1)-O(37)  | 98.1(6)  |
| O(33)-W(5)-O(24)  | 169.4(4) | O(36)-Na(1)-O(37)  | 88.9(5)  |
| O(31)-W(5)-O(24)  | 86.7(4)  | O(40)-Na(1)-O(37)  | 162.0(5) |
| O(15)-W(5)-O(24)  | 73.7(4)  | O(47)-Na(1)-O(51)  | 83.2(9)  |
| O(22)-W(5)-O(24)  | 88.1(4)  | O(36)-Na(1)-O(51)  | 102.1(8) |
| O(29)-W(5)-O(24)  | 75.2(4)  | O(40)-Na(1)-O(51)  | 83.1(7)  |
| O(34)-W(6)-O(3)   | 102.7(7) | O(37)-Na(1)-O(51)  | 86.6(7)  |
| O(34)-W(6)-O(28)  | 99.5(5)  | O(47)-Na(1)-O(39)  | 86.1(7)  |
| O(3)-W(6)-O(28)   | 89.2(4)  | O(36)-Na(1)-O(39)  | 89.3(5)  |
| O(34)-W(6)-O(20)  | 97.9(5)  | O(40)-Na(1)-O(39)  | 104.3(5) |
| O(3)-W(6)-O(20)   | 88.6(5)  | O(37)-Na(1)-O(39)  | 88.6(5)  |
| O(28)-W(6)-O(20)  | 162.6(4) | O(51)-Na(1)-O(39)  | 167.6(8) |
| O(34)-W(6)-O(15)  | 94.3(6)  | O(48)-Na(2)-O(41)  | 98.9(6)  |
| O(3)-W(6)-O(15)   | 162.8(5) | O(48)-Na(2)-O(49)  | 103.8(8) |
| O(28)-W(6)-O(15)  | 90.7(4)  | O(41)-Na(2)-O(49)  | 151.7(7) |
| O(20)-W(6)-O(15)  | 86.3(5)  | O(48)-Na(2)-O(12)  | 97.1(6)  |

|                  |          |                       |          |
|------------------|----------|-----------------------|----------|
| O(34)-W(6)-O(24) | 166.6(5) | O(41)-Na(2)-O(12)     | 99.6(5)  |
| O(3)-W(6)-O(24)  | 88.3(5)  | O(49)-Na(2)-O(12)     | 94.1(6)  |
| O(28)-W(6)-O(24) | 88.0(4)  | O(48)-Na(2)-O(43)     | 83.8(7)  |
| O(20)-W(6)-O(24) | 74.6(4)  | O(41)-Na(2)-O(43)     | 80.0(5)  |
| O(15)-W(6)-O(24) | 74.5(4)  | O(49)-Na(2)-O(43)     | 85.9(6)  |
| O(8)-W(7)-O(27)  | 103.0(5) | O(12)-Na(2)-O(43)     | 179.0(6) |
| O(8)-W(7)-O(1)   | 101.0(5) | O(48)-Na(2)-O(35)     | 173.0(6) |
| O(27)-W(7)-O(1)  | 94.0(5)  | O(41)-Na(2)-O(35)     | 74.1(4)  |
| O(8)-W(7)-O(11)  | 97.8(5)  | O(49)-Na(2)-O(35)     | 82.7(7)  |
| O(27)-W(7)-O(11) | 92.1(5)  | O(12)-Na(2)-O(35)     | 84.7(5)  |
| O(1)-W(7)-O(11)  | 158.4(4) | O(43)-Na(2)-O(35)     | 94.4(5)  |
| O(8)-W(7)-O(16)  | 90.4(5)  | O(38)-Na(3)-O(39)     | 101.0(5) |
| O(27)-W(7)-O(16) | 166.2(5) | O(38)-Na(3)-O(45)     | 82.7(5)  |
| O(1)-W(7)-O(16)  | 86.5(4)  | O(39)-Na(3)-O(45)     | 172.7(6) |
| O(11)-W(7)-O(16) | 82.8(4)  | O(38)-Na(3)-O(42)     | 82.4(5)  |
| O(8)-W(7)-O(23)  | 161.4(4) | O(39)-Na(3)-O(42)     | 93.8(5)  |
| O(27)-W(7)-O(23) | 93.6(5)  | O(45)-Na(3)-O(42)     | 80.4(5)  |
| O(1)-W(7)-O(23)  | 86.1(4)  | O(38)-Na(3)-O(37)     | 168.6(5) |
| O(11)-W(7)-O(23) | 72.8(4)  | O(39)-Na(3)-O(37)     | 90.2(5)  |
| O(16)-W(7)-O(23) | 72.7(4)  | O(45)-Na(3)-O(37)     | 85.9(5)  |
| O(30)-W(8)-O(18) | 101.3(5) | O(42)-Na(3)-O(37)     | 94.7(5)  |
| O(30)-W(8)-O(22) | 100.7(5) | O(38)-Na(3)-O(4)      | 93.4(4)  |
| O(18)-W(8)-O(22) | 87.8(4)  | O(39)-Na(3)-O(4)      | 84.4(4)  |
| O(30)-W(8)-O(9)  | 96.9(5)  | O(45)-Na(3)-O(4)      | 101.8(5) |
| O(18)-W(8)-O(9)  | 161.8(4) | O(42)-Na(3)-O(4)      | 175.0(5) |
| O(22)-W(8)-O(9)  | 88.4(4)  | O(37)-Na(3)-O(4)      | 90.0(4)  |
| O(30)-W(8)-O(7)  | 94.7(5)  | O(44)-Na(4)-O(33)#4   | 79.8(5)  |
| O(18)-W(8)-O(7)  | 89.7(4)  | O(44)-Na(4)-O(41)     | 163.0(6) |
| O(22)-W(8)-O(7)  | 164.7(4) | O(33)#4-Na(4)-O(41)   | 102.4(5) |
| O(9)-W(8)-O(7)   | 89.2(4)  | O(44)-Na(4)-O(40)#5   | 116.5(6) |
| O(30)-W(8)-O(21) | 165.9(4) | O(33)#4-Na(4)-O(40)#5 | 80.2(4)  |
| O(18)-W(8)-O(21) | 88.1(4)  | O(41)-Na(4)-O(40)#5   | 80.3(4)  |
| O(22)-W(8)-O(21) | 90.1(4)  | O(44)-Na(4)-O(46)     | 87.7(6)  |
| O(9)-W(8)-O(21)  | 74.1(4)  | O(33)#4-Na(4)-O(46)   | 149.5(5) |
| O(7)-W(8)-O(21)  | 74.7(3)  | O(41)-Na(4)-O(46)     | 82.1(5)  |
| O(6)-W(9)-O(13)  | 103.0(6) | O(40)#5-Na(4)-O(46)   | 130.0(5) |
| O(6)-W(9)-O(11)  | 99.1(6)  | O(44)-Na(4)-O(36)#5   | 78.9(5)  |
| O(13)-W(9)-O(11) | 94.6(5)  | O(33)#4-Na(4)-O(36)#5 | 131.0(5) |
| O(6)-W(9)-O(32)  | 98.4(6)  | O(41)-Na(4)-O(36)#5   | 110.4(5) |
| O(13)-W(9)-O(32) | 91.4(5)  | O(40)#5-Na(4)-O(36)#5 | 71.0(4)  |
| O(11)-W(9)-O(32) | 159.8(4) | O(46)-Na(4)-O(36)#5   | 72.2(5)  |
| O(6)-W(9)-O(25)  | 90.6(5)  | O(44)-Na(4)-O(43)     | 90.4(5)  |
| O(13)-W(9)-O(25) | 166.4(5) | O(33)#4-Na(4)-O(43)   | 76.7(5)  |
| O(11)-W(9)-O(25) | 83.8(4)  | O(41)-Na(4)-O(43)     | 74.0(5)  |

|                       |          |                     |           |
|-----------------------|----------|---------------------|-----------|
| O(32)-W(9)-O(25)      | 85.9(4)  | O(40)#5-Na(4)-O(43) | 140.5(5)  |
| O(6)-W(9)-O(23)       | 162.7(5) | O(46)-Na(4)-O(43)   | 75.6(5)   |
| O(13)-W(9)-O(23)      | 93.6(5)  | O(36)#5-Na(4)-O(43) | 146.4(5)  |
| O(11)-W(9)-O(23)      | 74.4(4)  | O(45)-Na(5)-O(2)#1  | 85.0(6)   |
| O(32)-W(9)-O(23)      | 85.9(4)  | O(45)-Na(5)-O(54)   | 162.7(14) |
| O(25)-W(9)-O(23)      | 72.9(4)  | O(2)#1-Na(5)-O(54)  | 93.6(12)  |
| O(5)-W(10)-O(19)      | 97.6(4)  | O(45)-Na(5)-O(42)   | 81.4(5)   |
| O(5)-W(10)-O(14)#1    | 95.0(4)  | O(2)#1-Na(5)-O(42)  | 162.0(5)  |
| O(19)-W(10)-O(14)#1   | 165.5(4) | O(54)-Na(5)-O(42)   | 96.0(12)  |
| O(5)-W(10)-O(14)      | 163.9(4) | O(45)-Na(5)-O(50)   | 83.3(7)   |
| O(19)-W(10)-O(14)     | 92.2(4)  | O(2)#1-Na(5)-O(50)  | 108.0(6)  |
| O(14)#1-W(10)-O(14)   | 77.1(4)  | O(54)-Na(5)-O(50)   | 113.4(14) |
| O(5)-W(10)-O(17)      | 97.4(4)  | O(42)-Na(5)-O(50)   | 82.1(6)   |
| O(19)-W(10)-O(17)     | 89.4(4)  | O(45)-Na(5)-O(38)   | 78.6(5)   |
| O(14)#1-W(10)-O(17)   | 82.0(4)  | O(2)#1-Na(5)-O(38)  | 87.0(5)   |
| O(14)-W(10)-O(17)     | 95.4(4)  | O(54)-Na(5)-O(38)   | 84.1(14)  |
| O(5)-W(10)-O(3)#1     | 87.1(4)  | O(42)-Na(5)-O(38)   | 78.8(5)   |
| O(19)-W(10)-O(3)#1    | 95.1(4)  | O(50)-Na(5)-O(38)   | 155.4(7)  |
| O(14)#1-W(10)-O(3)#1  | 92.6(4)  | O(47)-Na(6)-O(52)   | 107.5(11) |
| O(14)-W(10)-O(3)#1    | 79.4(4)  | O(47)-Na(6)-O(53)   | 141.4(13) |
| O(17)-W(10)-O(3)#1    | 173.2(4) | O(52)-Na(6)-O(53)   | 108.7(14) |
| O(24)-Zn(1)-O(23)     | 108.0(4) | O(47)-Na(6)-O(7)    | 81.0(7)   |
| O(24)-Zn(1)-O(21)     | 103.8(4) | O(52)-Na(6)-O(7)    | 122.2(12) |
| O(23)-Zn(1)-O(21)     | 107.3(4) | O(53)-Na(6)-O(7)    | 90.7(11)  |
| O(24)-Zn(1)-O(14)     | 113.8(4) | O(47)-Na(6)-O(51)   | 76.2(9)   |
| O(23)-Zn(1)-O(14)     | 109.4(4) | O(52)-Na(6)-O(51)   | 96.0(10)  |
| O(21)-Zn(1)-O(14)     | 114.1(4) | O(53)-Na(6)-O(51)   | 87.2(10)  |
| O(13)#1-Mn(1)-O(27)#1 | 91.6(5)  | O(7)-Na(6)-O(51)    | 140.1(10) |
| O(13)#1-Mn(1)-O(14)#1 | 94.1(4)  | Na(1)-O(36)-Na(4)#3 | 97.5(5)   |
| O(27)#1-Mn(1)-O(14)#1 | 93.4(4)  | Na(1)-O(37)-Na(3)   | 90.4(5)   |
| O(13)#1-Mn(1)-O(35)   | 85.9(5)  | Na(3)-O(38)-Na(5)   | 81.5(4)   |
| O(27)#1-Mn(1)-O(35)   | 93.1(4)  | Na(3)-O(39)-Na(1)   | 90.7(5)   |
| O(14)#1-Mn(1)-O(35)   | 173.5(4) | Na(1)-O(40)-Na(4)#3 | 96.9(5)   |
| O(13)#1-Mn(1)-O(3)    | 93.7(5)  | Na(2)-O(41)-Na(4)   | 107.2(6)  |
| O(27)#1-Mn(1)-O(3)    | 170.1(5) | Na(5)-O(42)-Na(3)   | 83.3(4)   |
| O(14)#1-Mn(1)-O(3)    | 77.9(5)  | Na(2)-O(43)-Na(4)   | 98.5(5)   |
| O(35)-Mn(1)-O(3)      | 95.6(5)  | Na(5)-O(45)-Na(3)   | 84.7(5)   |
| O(13)#1-Mn(1)-O(17)   | 171.4(5) | Na(6)-O(47)-Na(1)   | 100.5(10) |
| O(27)#1-Mn(1)-O(17)   | 90.9(5)  | Na(1)-O(51)-Na(6)   | 83.5(8)   |
| O(14)#1-Mn(1)-O(17)   | 77.6(4)  |                     |           |

Symmetry transformations used to generate equivalent atoms: #1: -x+2, -y-1, -z; #2: x-1/2, -y-1/2, z+1/2; #3: -x+5/2, y+1/2, -z-1/2; #4: x+1/2, -y-1/2, z-1/2; #5: -x+5/2, y-1/2, -z-1/2.
